# Supplementary material for: Next generation biosecurity: Towards genome based identification to prevent spread of agronomic pests and pathogens using nanopore sequencing
Source: PLoS One. 2022 Jul 25;17(7):e0270897. doi: 10.1371/journal.pone.0270897 (PMC9312391; doi:10.1371/journal.pone.0270897)
Supplement: S4 Table — (XLSX) [file pone.0270897.s005.xlsx]

## Sheet: Tabelle1
S4 Table. Mapping single copy nuclear genes in three Diptera species for which more than 0.5 Mio reads were sequenced.
Species	Gene	Mapped to Reference Sequence	N reads analyzed	Sequence Length	% Pairwise ID	Bit-Score	E-Value	% Query Coverage	N reads mapped to refbase	Max reads in contig	Best Hit	Remarks
Bactrocera dorsalis	Beta Actin	10 Diptera Beta Actin sequences between 500 and 2000 bp long from GenBank (21 Oct 2021)	507790	1087	99.5	1978.88	0	99.82	923	402	XM_011203913	PREDICTED: Bactrocera dorsalis actin-2, muscle-specific (LOC105225453), mRNA
Bactrocera dorsalis	Arginin Kinase	434 Diptera Arginin Kinase sequences between 500 and 2000 bp long from GenBank (21 Oct 2021)	507790	1480	99.5	2686.15	0	82.88	705	95	XM_019992574	PREDICTED: Bactrocera dorsalis arginine kinase (LOC105232635), transcript variant X6, mRNA
Bactrocera dorsalis	Elongation Factor Alpha	272 Bactrocera Elongation Factor alpha sequences between 500 and 2000 bp long from GenBank (21 Oct 2021)	507790	1146	99.6	2091.53	0	59.05	2971	384	XM_011214999	PREDICTED: Bactrocera dorsalis elongation factor 1-alpha 1 (LOC105233054), mRNA
Bactrocera dorsalis	Glyceraldehyde-3-phosphate dehydrogenase (GAPDH)	10 Diptera GAPDH sequences between 500 and 2000 bp long from GenBank (21 Oct 2021)	507790	1291	99.4	2335.29	0	95.76	39	37	XM_011200533	PREDICTED: Bactrocera dorsalis glyceraldehyde-3-phosphate dehydrogenase (LOC105222960), mRNA
Bactrocera dorsalis	Alpha Tubulin	10 Diptera Alpha Tubulin sequences between 500 and 2000 bp long from GenBank (21 Oct 2021)	507790	526	97.9	904.132	0	82.35	795	16	XM_011212814	PREDICTED: Bactrocera dorsalis tubulin alpha-1 chain (LOC105231497), mRNA
Liriomyza sativae	Beta Actin	10 Diptera Beta Actin sequences between 500 and 2000 bp long from GenBank (21 Oct 2021)	2144881	503	91.2	669.607	0	99.21	1660	313	KC207081	Chrysomya megacephala actin mRNA, complete cds
Liriomyza sativae	Arginin Kinase	434 Diptera Arginin Kinase sequences between 500 and 2000 bp long from GenBank (21 Oct 2021)	2144881	417	86.3	449.856	8.74e-122	73.7	395	48	XM_037961819	PREDICTED: Lucilia sericata arginine kinase (LOC119607732), transcript variant X5, mRNA
Liriomyza sativae	Elongation Factor Alpha	272 Bactrocera Elongation Factor alpha sequences between 500 and 2000 bp long from GenBank (21 Oct 2021)	2144881	523	99.8	961.378	0	100	1591	222	AB106619	Liriomyza sativae gene for elongation factor-1 alpha, partial sequence, country:Japan:Okinawa
Liriomyza sativae	Glyceraldehyde-3-phosphate dehydrogenase (GAPDH)	10 Diptera GAPDH sequences between 500 and 2000 bp long from GenBank (21 Oct 2021)	2144881	996	97	1674.18	0	100	195	186	KY558637	Liriomyza trifolii glyceraldehyde-3-phosphate dehydrogenase (gapdh) gene, partial cds
Liriomyza sativae	Alpha Tubulin	10 Diptera Alpha Tubulin sequences between 500 and 2000 bp long from GenBank (21 Oct 2021)	2144881	1350	98.3	2366.68	0	100	2379	395	KY558640	Liriomyza trifolii alpha tubulin (TUB) mRNA, partial cds
Drosophila suzukii	Beta Actin	10 Diptera Beta Actin sequences between 500 and 2000 bp long from GenBank (21 Oct 2021)	2264295	129	98.4	217.178	2.3e-51	10.05	1621	1612	XM_017076206	PREDICTED: Drosophila suzukii actin-5C (LOC108011133), mRNA
Drosophila suzukii	Arginin Kinase	434 Diptera Arginin Kinase sequences between 500 and 2000 bp long from GenBank (21 Oct 2021)	2264295	302	96.2	475.709	4.82e-129	16.39	155	20	XM_036815206	PREDICTED: Drosophila suzukii arginine kinase (LOC108013043), transcript variant X3, mRNA
Drosophila suzukii	Elongation Factor Alpha	272 Bactrocera Elongation Factor alpha sequences between 500 and 2000 bp long from GenBank (21 Oct 2021)	2264295	500	95.6	773.02	0	25.52	190	26	XM_017073184	PREDICTED: Drosophila suzukii elongation factor 1-alpha 1 (LOC108009113), mRNA
Drosophila suzukii	Glyceraldehyde-3-phosphate dehydrogenase (GAPDH)	10 Diptera GAPDH sequences between 500 and 2000 bp long from GenBank (21 Oct 2021)	2264295	145	94.5	220.872	1.36e-52	14.3	15	3	KY558637	Liriomyza trifolii glyceraldehyde-3-phosphate dehydrogenase (gapdh) gene, partial cds
Drosophila suzukii	Alpha Tubulin	10 Diptera Alpha Tubulin sequences between 500 and 2000 bp long from GenBank (21 Oct 2021)	2264295	727	94.2	1114.65	0	100	2620	16	KY558640	Liriomyza trifolii alpha tubulin (TUB) mRNA, partial cds
